# Supplementary material
Source: ML conference proceedings conference paper supplement (https://openreview.net/forum?id=gzNSKxv25z)
Supplement: supplementary_material [file a_cat.pdf › PIBISA/NIB/results/a_cat.pdf]

a cat .

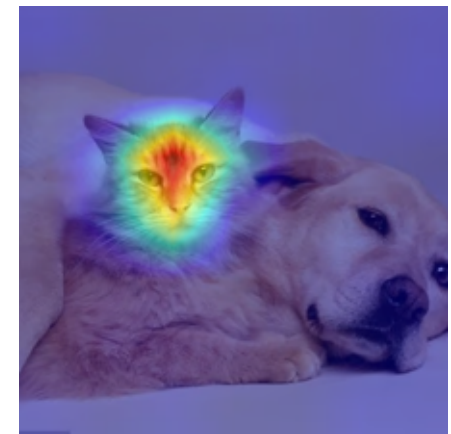

Chefer

a cat .

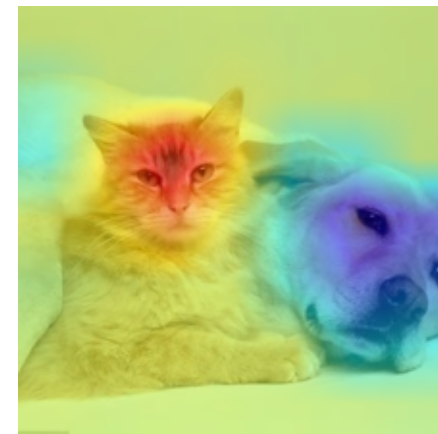

Fast IG

a cat .

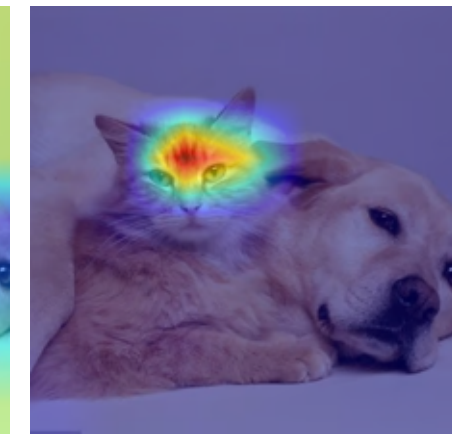

Grad-CAM

a cat .

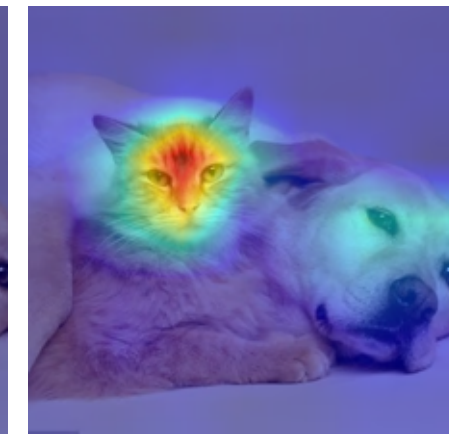

M2IB

a cat .

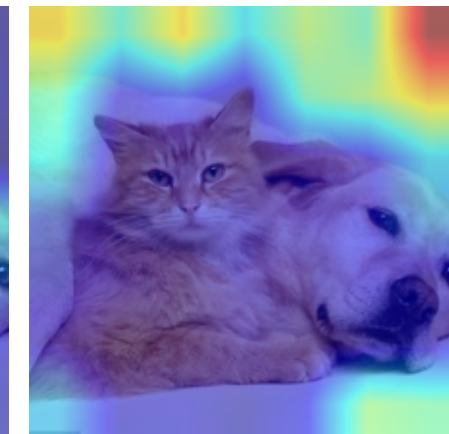

MFABA

a cat .

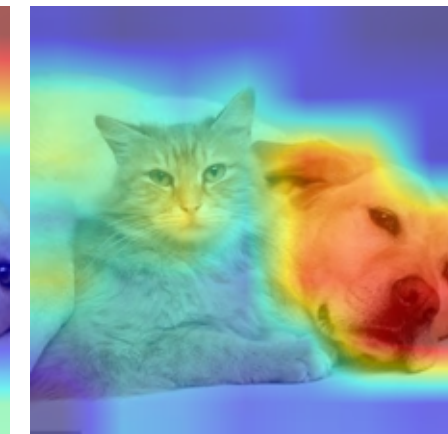

Saliency Map

a cat .

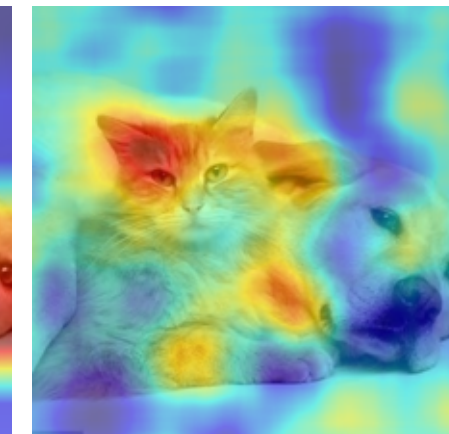

RISE

a cat .

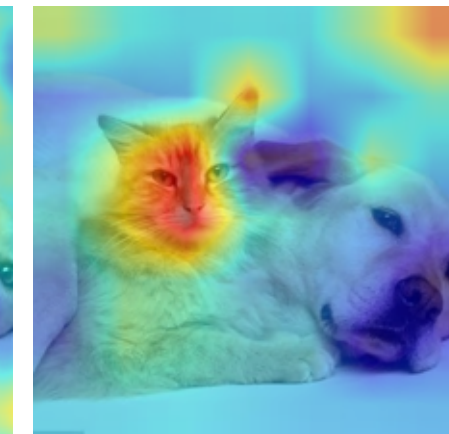

NIB (Ours)
