# Supplementary material
Source: ML conference proceedings conference paper supplement (https://openreview.net/forum?id=gzNSKxv25z)
Supplement: supplementary_material [file a_cat_and_a_dog.pdf › PIBISA/NIB/results/a_cat_and_a_dog.pdf]

a cat and a dog .

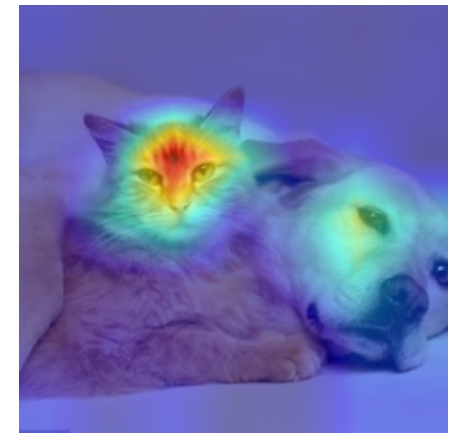

Chefer

a cat and a dog .

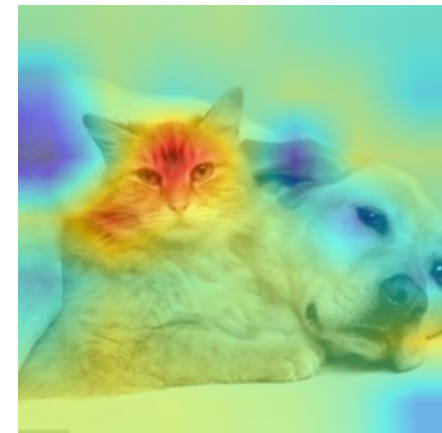

Fast IG

a cat and a dog .

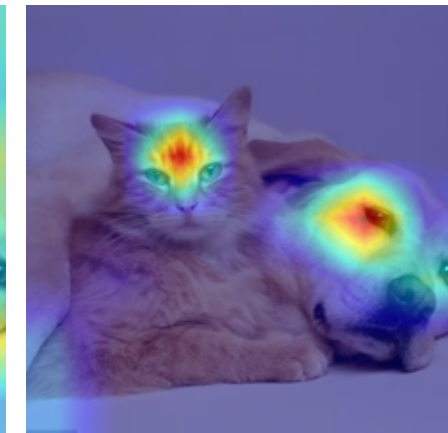

Grad-CAM

a cat and a dog .

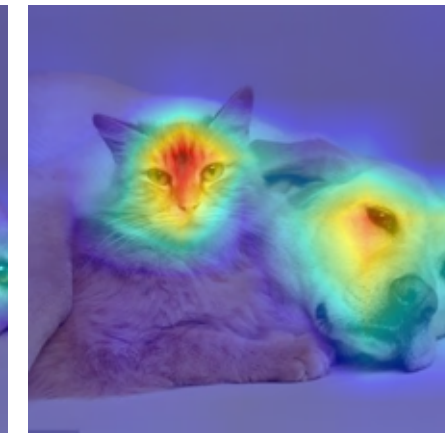

M2IB

a cat and a dog .

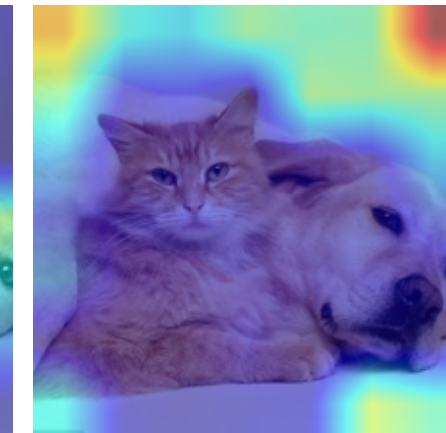

MFABA

a cat and a dog .

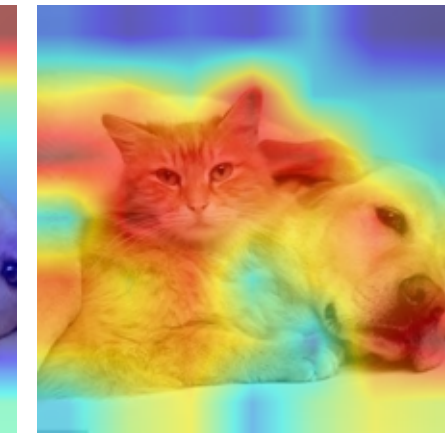

Saliency Map

a cat and a dog .

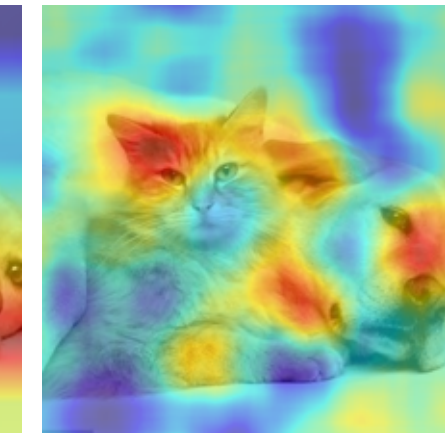

RISE

a cat and a dog .

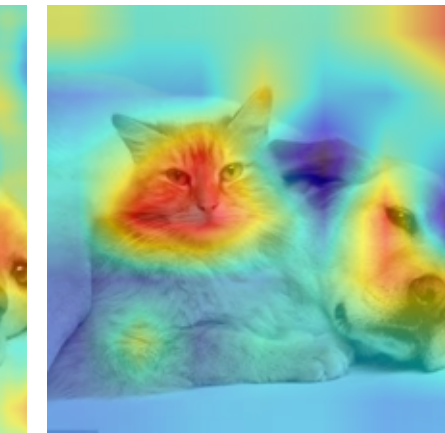

NIB (Ours)
