# Supplementary material
Source: ML conference proceedings conference paper supplement (https://openreview.net/forum?id=gzNSKxv25z)
Supplement: supplementary_material [file a_dog.pdf › PIBISA/NIB/results/a_dog.pdf]

a dog .

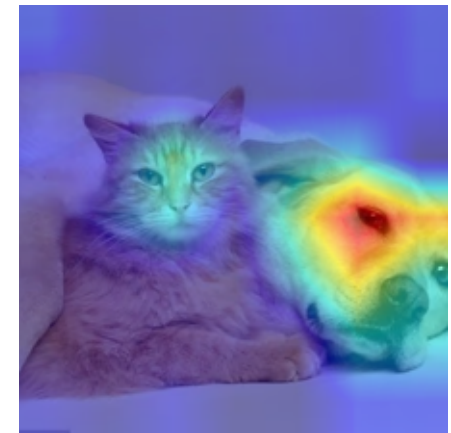

Chefer

a dog .

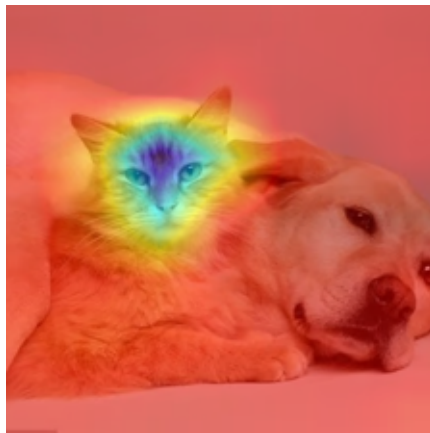

Fast IG

a dog .

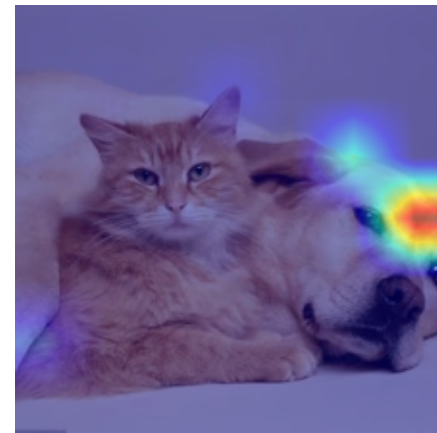

Grad-CAM

a dog .

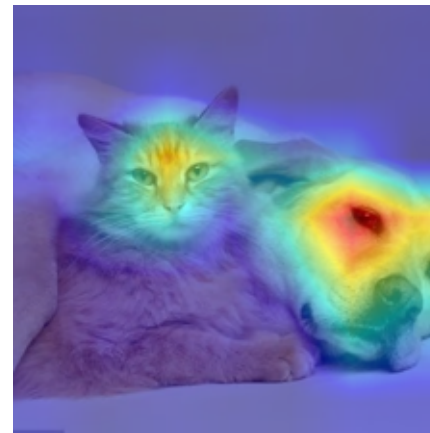

M2IB

a dog .

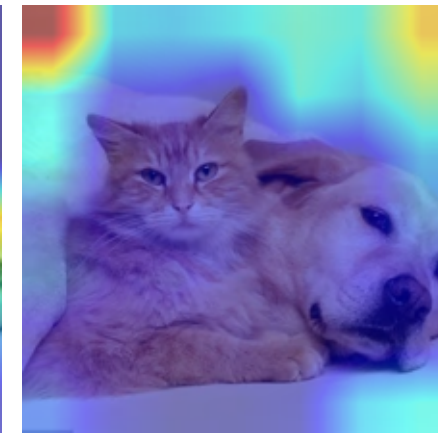

MFABA

a dog .

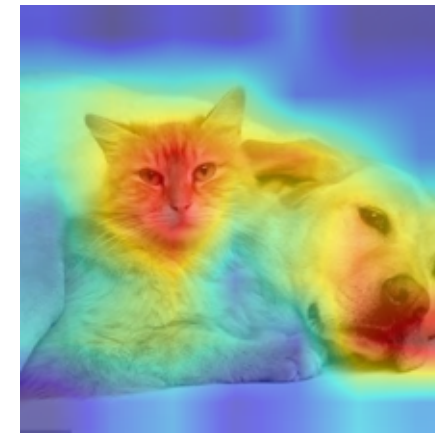

Saliency Map

a dog .

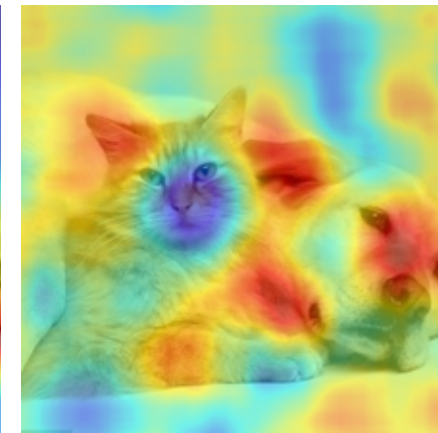

RISE

a dog .

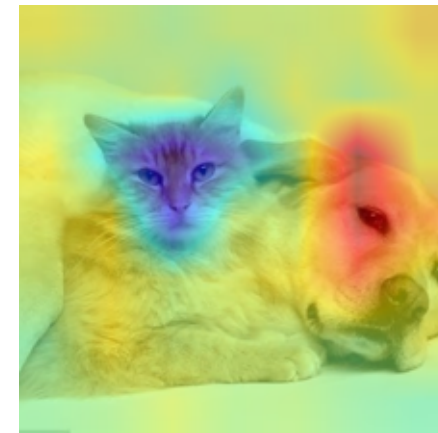

NIB (Ours)
